# Supplementary material for: Beyond the fish-Daphnia paradigm: testing the potential for Neoplea striola (Hemiptera: Pleidae) to cause a trophic cascade in subtropical ponds
Source: bioRxiv preprint, doi:10.1101/2021.04.14.439893, version 2 (2021-06-17)
Supplement: Supplemental Table 1 [file 439893_file06.docx]

**Table S1:**

**Phytoplankton morphospecies/taxa and their cell shape and mean cell biovolume.**

Taxa are listed in descending order of dominance defined by mean biovolume across all samples.

| **Morphospecies/taxon** | **Shape** | **Mean cell biovolume (μm3)** | **Group** |
| --- | --- | --- | --- |
| small ovoid chlorophyte | spheroid | 10.5 | small |
| large ovoid chlorophyte | spheroid | 70.9 | large |
| *Oocystis* | spheroid | 75.1 | large |
| pennate diatom | pennate (rectangular prism tapering to points at each end) | 56.7 | large |
| green picoplankton | sphere | 2.11 | small |
| green round (*Chlorella*) | sphere | 4.95 | small |
| *Selenastrum* | curved cylinder ending in 2 half-spheres | 11.1 | small |
